# Supplementary material for: Insulin resistance and dysglycemia are associated with left ventricular remodeling after myocardial infarction in non-diabetic patients
Source: Springer Nature journal article supplement (doi:10.1186/s12933-019-0904-3), 2019-08-07
Supplement: MOESM1 [file 17047108]

## ONLINE SUPPLEMENTS

**Table S1. Comparison of  $\Delta$  echocardiography parameters grouped by IFG dichotomy.**

| <b><math>\Delta</math>Geometric/functional parameters</b> | <b>Non-IFG<br/>(n=291)</b> | <b>IFG<br/>(n=194)</b> | <b><i>P</i>-value</b> |
|-----------------------------------------------------------|----------------------------|------------------------|-----------------------|
| LVEDD, mm                                                 | 0.42 (2.98)                | 1.74 (3.99)            | <0.001                |
| LVESD, mm                                                 | -0.11 (3.41)               | 0.91 (4.27)            | 0.004                 |
| LVEDVI, mL/m <sup>2</sup>                                 | 1.39 (9.71)                | 5.92 (13.82)           | <0.001                |
| LVESVI, mL/m <sup>2</sup>                                 | -0.36 (6.98)               | 2.06 (9.53)            | 0.001                 |
| LVMI, g/m <sup>2</sup>                                    | -1.04 (15.86)              | -0.66 (17.03)          | 0.805                 |
| IVST, mm                                                  | -0.23 (1.24)               | -0.41 (1.43)           | 0.145                 |
| LVPWT, mm                                                 | -0.12 (1.09)               | -0.34 (1.19)           | 0.038                 |
| RWT                                                       | -0.01 (0.05)               | -0.02 (0.06)           | 0.002                 |
| LVEF, %                                                   | 1.42 (6.24)                | 1.30 (6.65)            | 0.851                 |

IFG, impaired fasting glucose; IVST, interventricular septal thickness; LVEDD, left ventricular end-diastolic diameter; LVEDVI, left ventricular end-diastolic volume indexed to body surface area; LVEF, left ventricular ejection fraction; LVESD, left ventricular end-systolic diameter; LVESVI, left ventricular end-systolic volume indexed to body surface area; LVMI, left ventricular mass indexed to body surface area; LVPWT, left ventricular posterior wall thickness; RWT, relative wall thickness.

**Table S2. Comparison of  $\Delta$  echocardiography parameters grouped by IGT dichotomy.**

| <b><math>\Delta</math>Geometric/functional Parameters</b> | <b>Non-IGT (n=290)</b> | <b>IGT (n=195)</b> | <b>P-value</b> |
|-----------------------------------------------------------|------------------------|--------------------|----------------|
| LVEDD, mm                                                 | 0.60 (3.04)            | 1.46 (3.99)        | 0.007          |
| LVESD, mm                                                 | 0.16 (3.20)            | 0.50 (4.56)        | 0.337          |
| LVEDVI, mL/m <sup>2</sup>                                 | 2.07 (10.27)           | 4.80 (13.39)       | 0.012          |
| LVESVI, mL/m <sup>2</sup>                                 | 0.26 (6.84)            | 1.11 (9.81)        | 0.264          |
| LVMI, g/m <sup>2</sup>                                    | -1.08 (15.54)          | -0.59 (17.43)      | 0.748          |
| IVST, mm                                                  | -0.26 (1.13)           | -0.35 (1.57)       | 0.447          |
| LVPWT, mm                                                 | -0.11 (1.06)           | -0.34 (1.23)       | 0.026          |
| RWT                                                       | -0.01 (0.05)           | -0.02 (0.06)       | 0.013          |
| LVEF, %                                                   | 1.11 (5.74)            | 1.75 (7.27)        | 0.281          |

IGT, impaired glucose tolerance; IVST, interventricular septal thickness; LVEDD, left ventricular end-diastolic diameter; LVEDVI, left ventricular end-diastolic volume indexed to body surface area; LVEF, left ventricular ejection fraction; LVESD, left ventricular end-systolic diameter; LVESVI, left ventricular end-systolic volume indexed to body surface area; LVMI, left ventricular mass indexed to body surface area; LVPWT, left ventricular posterior wall thickness; RWT, relative wall thickness.

**Table S3. Comparison of  $\Delta$  echocardiography parameters grouped by prediabetes status.**

| <b><math>\Delta</math>Geometric/functional Parameters</b> | <b>Normoglycemia (n=133)</b> | <b>Prediabetes (n=352)</b> | <b>P-value</b> |
|-----------------------------------------------------------|------------------------------|----------------------------|----------------|
| LVEDD, mm                                                 | 0.44 (2.80)                  | 1.13 (3.69)                | 0.051          |
| LVESD, mm                                                 | 0.00 (3.07)                  | 0.41 (4.05)                | 0.295          |
| LVEDVI, mL/m <sup>2</sup>                                 | 1.70 (9.14)                  | 3.73 (12.50)               | 0.091          |
| LVESVI, mL/m <sup>2</sup>                                 | -0.28 (5.58)                 | 0.94 (8.94)                | 0.145          |
| LVMI, g/m <sup>2</sup>                                    | -1.17 (15.69)                | -0.78 (16.57)              | 0.816          |
| IVST, mm                                                  | -0.23 (1.11)                 | -0.32 (1.40)               | 0.506          |
| LVPWT, mm                                                 | -0.17 (1.13)                 | -0.22 (1.14)               | 0.710          |
| RWT                                                       | -0.01 (0.05)                 | -0.02 (0.05)               | 0.268          |
| LVEF, %                                                   | 1.62 (5.58)                  | 1.28 (6.69)                | 0.593          |

IGT, impaired glucose tolerance; IVST, interventricular septal thickness; LVEDD, left ventricular end-diastolic diameter; LVEDVI, left ventricular end-diastolic volume indexed to body surface area; LVEF, left ventricular ejection fraction; LVESD, left ventricular end-systolic diameter; LVESVI, left ventricular end-systolic volume indexed to body surface area; LVMI, left ventricular mass indexed to body surface area; LVPWT, left ventricular posterior wall thickness; RWT, relative wall thickness.

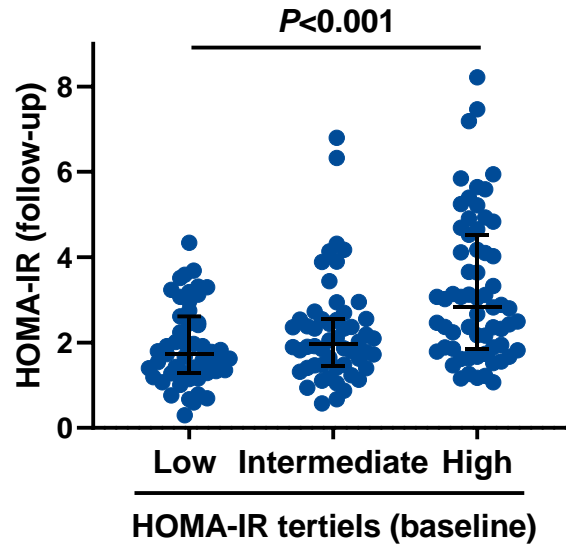

**Figure S1. HOMA-IR levels at follow-up grouped by HOMA-IR tertiles in the baseline.**

HOMA-IR level was reassessed in 168 subjects within the study population. Shown are HOMA-IR levels at follow-up group by tertiles of their respective values in the baseline. Horizontal bars: low, 25 percentile; middle, median; upper, 75 percentile.
